# Supplementary material for: Identification of tumor‐associated macrophage subsets that are associated with breast cancer prognosis
Source: PubMed Central journal article supplement (PMC7719284; doi:10.1002/ctm2.239), 2020-12-06
Supplement: CTM2-10-e239-s001.pdf [file CTM2-10-e239-s001.pdf]

## Supplemental Data

**Table S1:** Summary of patient cohort

|                        | <b>Patients n=41</b> |
|------------------------|----------------------|
| Female                 |                      |
| Mean age (range years) | 67 (38-84)           |
|                        |                      |
| <b>Diagnosis</b>       |                      |
| TNBC                   | 6                    |
| luminal B              | 26                   |
| luminal A              | 6                    |
| HER2 overexpression    | 3                    |
|                        |                      |
| <b>T status</b>        |                      |
| T1                     | 9                    |
| T2                     | 28                   |
| T3                     | 3                    |
| T4                     | 1                    |
|                        |                      |
| <b>N status</b>        |                      |
| N0                     | 21                   |
| N1                     | 18                   |
| Nx                     | 2                    |
|                        |                      |
| <b>M status</b>        |                      |
| M0                     | 40                   |
| M1                     | 1                    |
|                        |                      |
| <b>Therapy</b>         |                      |
| Radio                  | 20                   |
| Endo                   | 35                   |
| Chemo                  | 8                    |
| Antibody               | 1                    |
| not indicated          | 4                    |

**Table S2: FACS antibodies used for sorting and analysis**

| <b>antibody</b> | <b>fluorochrome</b> | <b>panel</b>  | <b>catalog no</b> | <b>company</b> | <b>RRID</b>     |
|-----------------|---------------------|---------------|-------------------|----------------|-----------------|
| CD1c            | PE/Dazzle 594       | myeloid       | 331531            | BioLegend      | AB_2565292      |
| CD4             | PE-CF594            | lymph         | 562316            | BD             | AB_11154394     |
| CD8             | BV786               | lymph         | 563823            | BD             | AB_2687487      |
| CD14            | PerCP-Cy5.5         | myeloid       | 561116            | BD             | AB_2033939      |
| CD14            | APC-H7              | lymph         | 560180            | BD             | RRID:AB_1645464 |
| CD15            | FITC                | myeloid/lymph | 560997            | BD             | AB_10563206     |
| CD16            | BV650               | myeloid/lymph | 563692            | BD             | AB_2744298      |
| CD19            | APC-H7              | myeloid/lymph | 560252            | BD             | AB_1645468      |
| CD25            | BV421               | lymph         | 562442            | BD             | AB_11154578     |
| CD33            | BV510               | myeloid/lymph | 563257            | BD             | RRID:AB_2738102 |
| CD45            | AF700               | myeloid/lymph | 368514            | BioLegend      | AB_2566374      |
| CD45            | AF700               | myeloid/lymph | 560566            | BD             | AB_1645452      |
| CD45RA          | BV605               | lymph         | 562886            | BD             | AB_2737865      |
| CD45RO          | PE                  | lymph         | 304205            | BioLegend      | AB_314421       |
| CD56            | PerCP-Cy5.5         | lymph         | 362505            | BioLegend      | AB_2563914      |
| CD64            | BV605               | myeloid       | 740406            | BD             | AB_2740136      |
| CD80            | BV711               | myeloid       | 740801            | BD             | AB_2740464      |
| CD86            | BV711               | myeloid       | 563158            | BD             | AB_2738036      |
| CD107a          | BV421               | lymph         | 562623            | BD             | AB_2737685      |
| CD124           | PE                  | myeloid       | 355004            | BioLegend      | AB_11219385     |
| CD127           | BV711               | lymph         | 563165            | BD             | AB_2738041      |
| CD127           | BV711               | lymph         | 351327            | BioLegend      | AB_11219191     |
| CD141           | BV785               | myeloid       | 344115            | BioLegend      | AB_2572194      |
| CD154           | BV421               | lymph         | 310823            | BioLegend      | AB_10933251     |
| CD163           | APC                 | myeloid       | 333610            | BioLegend      | AB_2074533      |

|                    |                   |                   |            |             |                 |
|--------------------|-------------------|-------------------|------------|-------------|-----------------|
| CD206              | PE/Cy7            | myeloid           | 321124     | BioLegend   | AB_1093324<br>8 |
| CD278              | PE/Cy7            | lymph             | 313519     | BioLegend   | AB_1064183<br>9 |
| CD279              | APC               | lymph             | 329907     | BioLegend   | AB_940473       |
| CD326              | FITC              | myeloid/<br>lymph | 324203     | BioLegend   | AB_756077       |
| HLA-DR             | APC/Fire<br>750   | myeloid/<br>lymph | 307658     | BioLegend   | AB_2572101      |
| LAG3               | PerCP-<br>eFuo710 | lymph             | 46-2239-41 | eBioscience | AB_2573731      |
| LOX-1              | PE                | myeloid           | 358603     | BioLegend   | AB_2562180      |
| MerTK              | BV421             | myeloid           | 367603     | BioLegend   | AB_2566396      |
| TCR $\alpha\beta$  | FITC              | myeloid/<br>lymph | 561673     | BD          | AB_1089281<br>1 |
| TCR $\gamma\delta$ | APC               | lymph             | 561049     | BD          | AB_1056407<br>2 |

**Table S3:** GSEA report for CD206<sup>+</sup> macrophages – GO terms

| NAME                                                 | ES    | NES   | NOM<br>p-val | FDR<br>q-val | FWER<br>p-val |
|------------------------------------------------------|-------|-------|--------------|--------------|---------------|
| GO_BODY_MORPHOGENESIS                                | -0,53 | -2,24 | 0,00         | 0,02         | 0,03          |
| GO_FACE_MORPHOGENESIS                                | -0,61 | -2,23 | 0,00         | 0,01         | 0,03          |
| GO_HEAD_MORPHOGENESIS                                | -0,55 | -2,19 | 0,00         | 0,02         | 0,05          |
| GO_KINESIN_COMPLEX                                   | -0,51 | -2,17 | 0,00         | 0,01         | 0,05          |
| GO_REGULATION_OF_POSTSYNAP<br>TIC_MEMBRANE_POTENTIAL | -0,52 | -2,05 | 0,00         | 0,06         | 0,18          |
| GO_CARGO_RECEPTOR_ACTIVITY                           | -0,45 | -2,01 | 0,00         | 0,08         | 0,25          |
| GO_CHEMICAL_SYNAPTIC_TRANS<br>MISSION_POSTSYNAPTIC   | -0,52 | -1,99 | 0,00         | 0,08         | 0,27          |
| GO_ANOIKIS                                           | -0,48 | -1,99 | 0,00         | 0,07         | 0,27          |
| GO_REGULATION_OF_NEUROLOGI<br>CAL_SYSTEM_PROCESS     | -0,45 | -1,94 | 0,00         | 0,11         | 0,37          |
| GO_ACID_THIOL_LIGASE_ACTIVITY                        | -0,51 | -1,92 | 0,00         | 0,13         | 0,42          |
| GO_ACETYLGLUCOSAMINYLTRAN<br>SFERASE_ACTIVITY        | -0,44 | -1,91 | 0,00         | 0,13         | 0,44          |
| GO_CILIARY_PLASM                                     | -0,42 | -1,85 | 0,01         | 0,22         | 0,56          |
| GO_SCAVENGER_RECEPTOR_ACT<br>IVITY                   | -0,47 | -1,82 | 0,01         | 0,25         | 0,60          |

**Table S4:** GSEA report for CD206<sup>+</sup> macrophages – GEO dataset accession

| NAME                                                            | ES    | NES   | NOM<br>p-val | FDR<br>q-val | FWER<br>p-val |
|-----------------------------------------------------------------|-------|-------|--------------|--------------|---------------|
| GSE2935_UV_INACTIVATED_VS_LIVE_SENDAI_VIRUS_INF_MACROPHAGE_UP   | -0,29 | -1,53 | 0,01         | 0,69         | 0,69          |
| GSE5589_IL6_KO_VS_IL10_KO_LPS_AND_IL10_STIM_MACROPHAGE_45MIN_UP | -0,27 | -1,51 | 0,02         | 0,73         | 0,71          |
| GSE25088_CTRL_VS_IL4_STIM_MACROPHAGE_UP                         | -0,27 | -1,49 | 0,03         | 0,73         | 0,73          |
| GSE25123_WT_VS_PPARG_KO_MACROPHAGE_ROSIGLITAZONE_STIM_UP        | -0,27 | -1,48 | 0,03         | 0,76         | 0,74          |
| GSE8515_CTRL_VS_IL1_4H_STIM_MAC_UP                              | -0,24 | -1,36 | 0,03         | 1,00         | 0,84          |
| GSE25123_CTRL_VS_IL4_STIM_PPARG_KO_MACROPHAGE_DN                | -0,27 | -1,47 | 0,04         | 0,77         | 0,75          |
| GSE19941_UNSTIM_VS_LPS_STIM_IL10_KO_NFKBP50_KO_MACROPHAGE_UP    | -0,29 | -1,57 | 0,04         | 0,65         | 0,65          |
| GSE24492_LYVE_NEG_VS_POS_MACROPHAGE_UP                          | -0,28 | -1,47 | 0,04         | 0,75         | 0,75          |
| GSE25088_WT_VS_STAT6_KO_MACROPHAGE_IL4_STIM_DN                  | -0,34 | -1,56 | 0,06         | 0,62         | 0,65          |
| GSE5099_MONOCYTE_VS_ALTERNATIVE_M2_MACROPHAGE_UP                | -0,25 | -1,32 | 0,06         | 1,00         | 0,86          |
| GSE28783_ANTI_MIR33_VS_CTRL_ATHEROSCLEROSIS_MACROPHAGE_DN       | -0,26 | -1,36 | 0,06         | 1,00         | 0,84          |
| GSE5589_LPS_VS_LPS_AND_IL6_STIM_IL6_KO_MACROPHAGE_45MIN_UP      | -0,24 | -1,34 | 0,07         | 1,00         | 0,85          |
| GSE360_T_GONDII_VS_M_TUBERCULOSIS_MAC_UP                        | -0,26 | -1,33 | 0,07         | 1,00         | 0,85          |
| GSE26343_WT_VS_NFAT5_KO_MACROPHAGE_UP                           | -0,24 | -1,30 | 0,08         | 0,99         | 0,87          |
| GSE26343_WT_VS_NFAT5_KO_MACROPHAGE_LPS_STIM_UP                  | -0,26 | -1,35 | 0,09         | 1,00         | 0,84          |

**Table S5:** Summary of TMA patient cohorts

|                          | <b>Relapsed ER+ breast cancer (patients n=54)</b> | <b>HER2+ breast cancer (patients n=38)</b> | <b>TNBC (patients n=26)</b> |
|--------------------------|---------------------------------------------------|--------------------------------------------|-----------------------------|
| Female                   |                                                   |                                            |                             |
| Mean age (range years) * | 62 (32-82)                                        | 58 (26-82)                                 | 50 (29-86)                  |
|                          |                                                   |                                            |                             |
| <b>Diagnosis *</b>       | ER+                                               | HER2+                                      | TNBC                        |
|                          |                                                   |                                            |                             |
| <b>T status *</b>        |                                                   |                                            |                             |
| T1                       | 10                                                | 18                                         | 4                           |
| T2                       | 30                                                | 15                                         | 22                          |
| T3                       | 7                                                 | 3                                          | -                           |
| T4                       | 7                                                 | 2                                          | -                           |
|                          |                                                   |                                            |                             |
| <b>N status *</b>        |                                                   |                                            |                             |
| N0                       | 5                                                 | 0                                          | 18                          |
| N1                       | 31                                                | 10                                         | 5                           |
| N2                       | 16                                                | 26                                         | 2                           |
| N3                       | 2                                                 | 2                                          | 1                           |
|                          |                                                   |                                            |                             |
| <b>M status *</b>        |                                                   |                                            |                             |
| M0                       | 54                                                | 38                                         | 26                          |
| M1                       | -                                                 | -                                          | -                           |
|                          |                                                   |                                            |                             |
| <b>Stage *</b>           |                                                   |                                            |                             |
| 1                        | 0                                                 | 0                                          | 18                          |
| 2                        | 29                                                | 9                                          | 5                           |
| 3                        | 25                                                | 29                                         | 3                           |
|                          |                                                   |                                            |                             |
| <b>Grade *</b>           |                                                   |                                            |                             |
| 1                        | 0                                                 | 0                                          | 0                           |
| 2                        | 12                                                | 5                                          | 0                           |
| 3                        | 42                                                | 33                                         | 26                          |

\* All variables determined at diagnosis

Figure S1

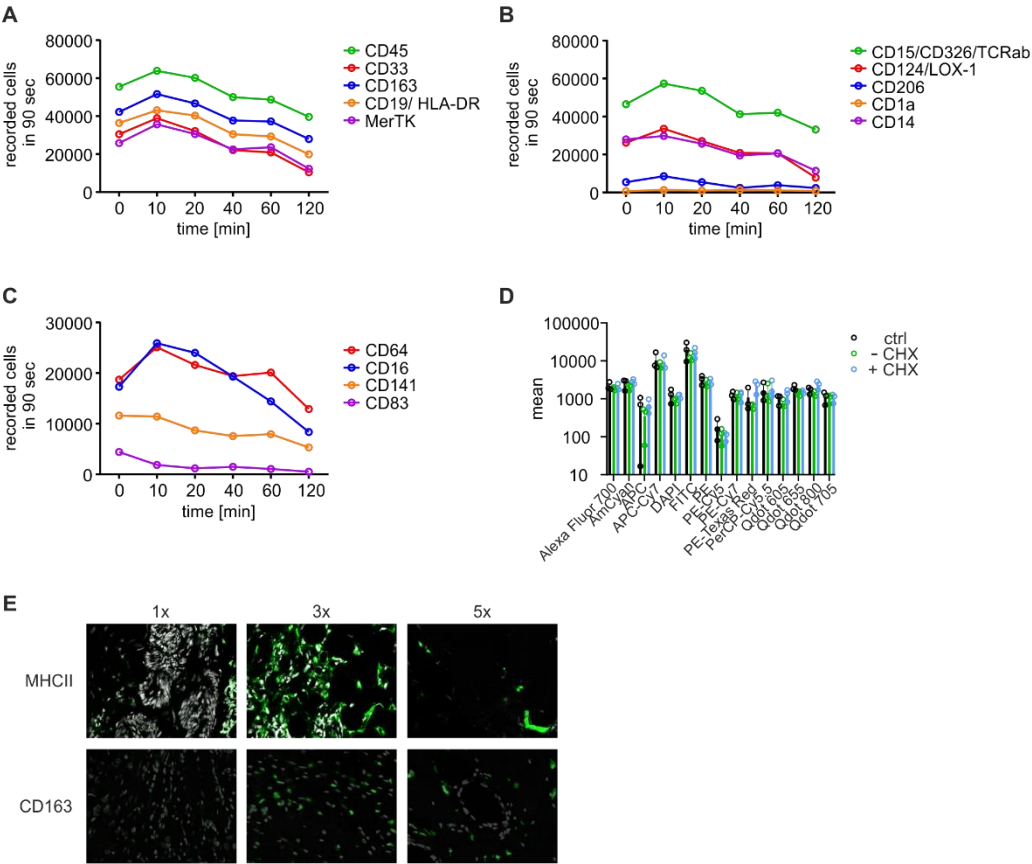

**Figure S 1:** Validation of epitope stability for FACS and immunofluorescence . **(A-C)** To study the stability of indicated markers a mixture of PBMCs, macrophages and MCF-7 cells were subjected to the tissue dissociation protocol indicated under Methods for up to 120 min at 37°C. Afterwards samples (n=3) were FACS analyzed. **(D)** Supplement of CHX into storage medium was tested for added epitope stability. Samples were either FACS analyzed directly (ctrl, black, n=3) or incubated for 4 h at 37°C with (+, blue, n=3) or without (-, green, n=3) CHX addition and then FACS analyzed. **(E)** Representative immunofluorescence staining of breast cancer tissue with MHCII or CD163. For the validation of epitope stability and sufficient antigen retrieval in immunofluorescence stainings, FFPE samples were subjected once, three times or five times to heat-induced epitope retrieval and afterwards stained with the

*indicated markers MHCII or CH163 (both green). Nuclei were counterstained with DAPI (white).*



Figure S2

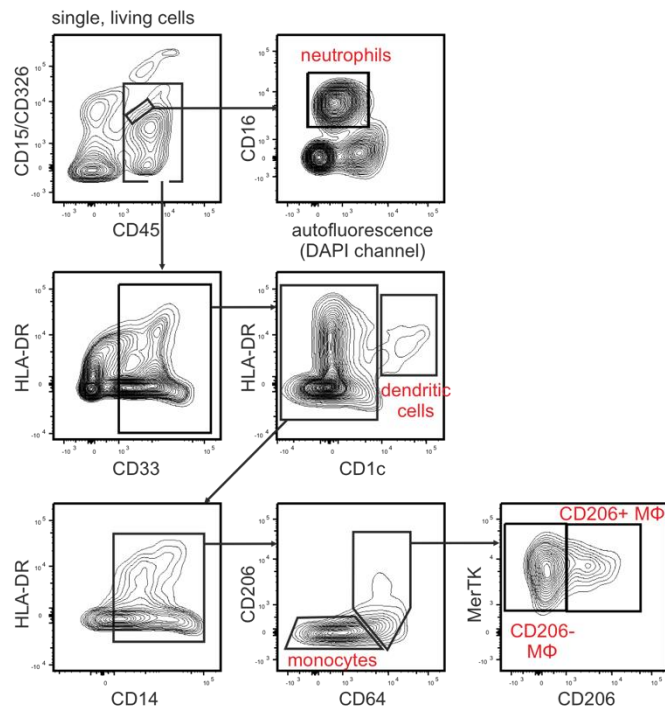

**Figure S2:** Gating strategy of myeloid cells in primary human breast cancer. After identification of single, living cells, immune cells were gated as  $CD45^+$  cells.  $CD16$  was used to identify neutrophils within  $CD15^{hi}$  cells.  $CD45^+$  cells were further gated for myeloid  $CD33^+$  cells. These cells were used to identify dendritic cells ( $HLA-DR^+$ ,  $CD1c^+$ ,  $MerTK^-$ ), monocytes ( $HLA-DR^{+/-}$ ,  $CD14^+$ ,  $CD64^{lo}$ ,  $MerTK^{lo}$ ), and macrophages ( $M\Phi$ ;  $MHCII^{hi}$ ,  $MerTK^+$ ), which were further separated by  $CD206$  expression.

Figure S3

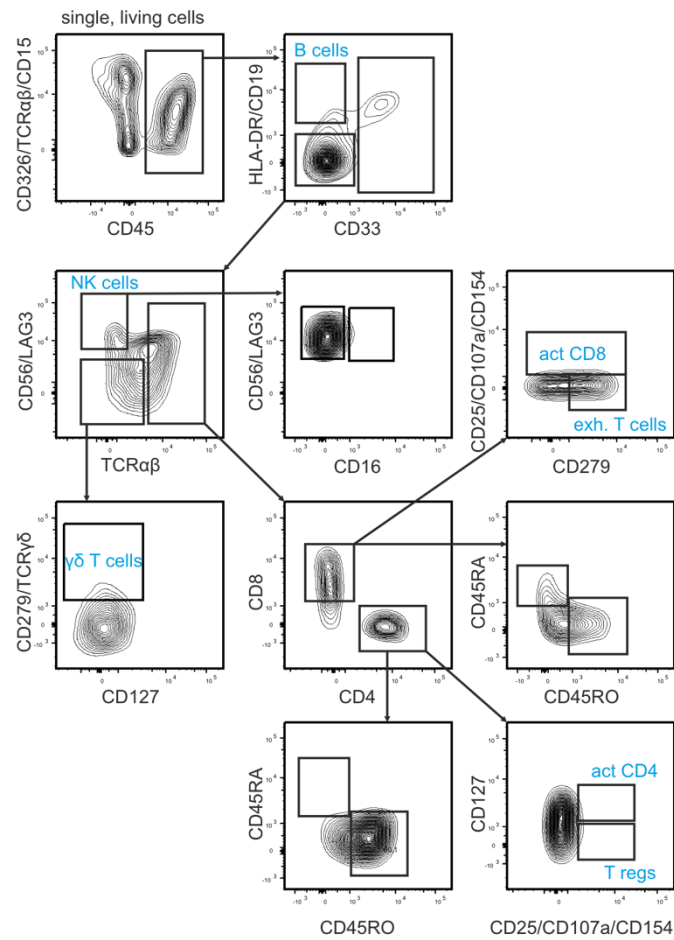

**Figure S3:** Gating strategy of lymphoid cells in primary human breast cancer. After identification of single, living cells, immune cells were gated as CD45<sup>+</sup> cells. CD33<sup>+</sup> lymphocytes were separated into B cells (CD33<sup>+</sup>, CD19<sup>+</sup>). Remaining CD33<sup>-</sup> cells were separated into CD56<sup>+</sup> cells (NK cells) and TCRαβ<sup>+</sup> cells. The TCRαβ<sup>+</sup> population was gated for TCRγδ to find γδ T cells. The TCRαβ<sup>+</sup> population was further separated into CD8<sup>+</sup> and CD4<sup>+</sup> T cells, which were both analyzed for memory (CD45RO) and naïve (CD45RA) populations. Activated CD8<sup>+</sup> T cells were CD107a<sup>+</sup> and exhausted (exh.) T cells were CD279<sup>+</sup>. Activated CD4<sup>+</sup> T cells were CD127<sup>+</sup> and regulatory T cells (T regs) were CD127<sup>low</sup> and CD25<sup>+</sup>.

Figure S4

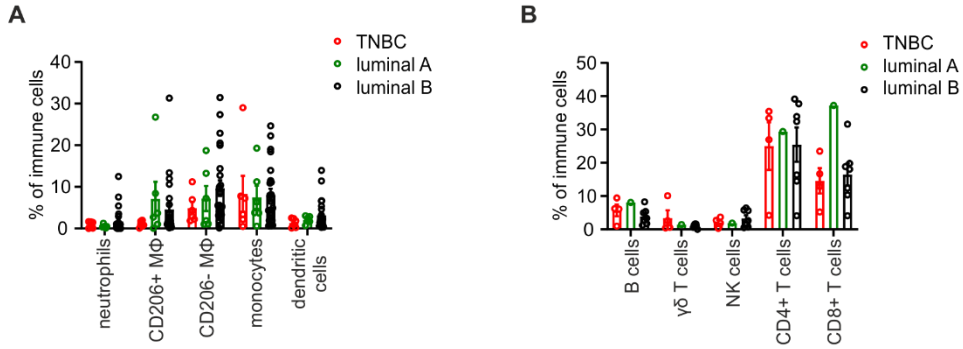

**Figure S 4:** FACS based analysis of myeloid (A) and lymphoid (B) immune cell composition clustered by molecular breast cancer subtype (luminal A (n=6), luminal B (n=26) and TNBC (n=6))

Figure S5

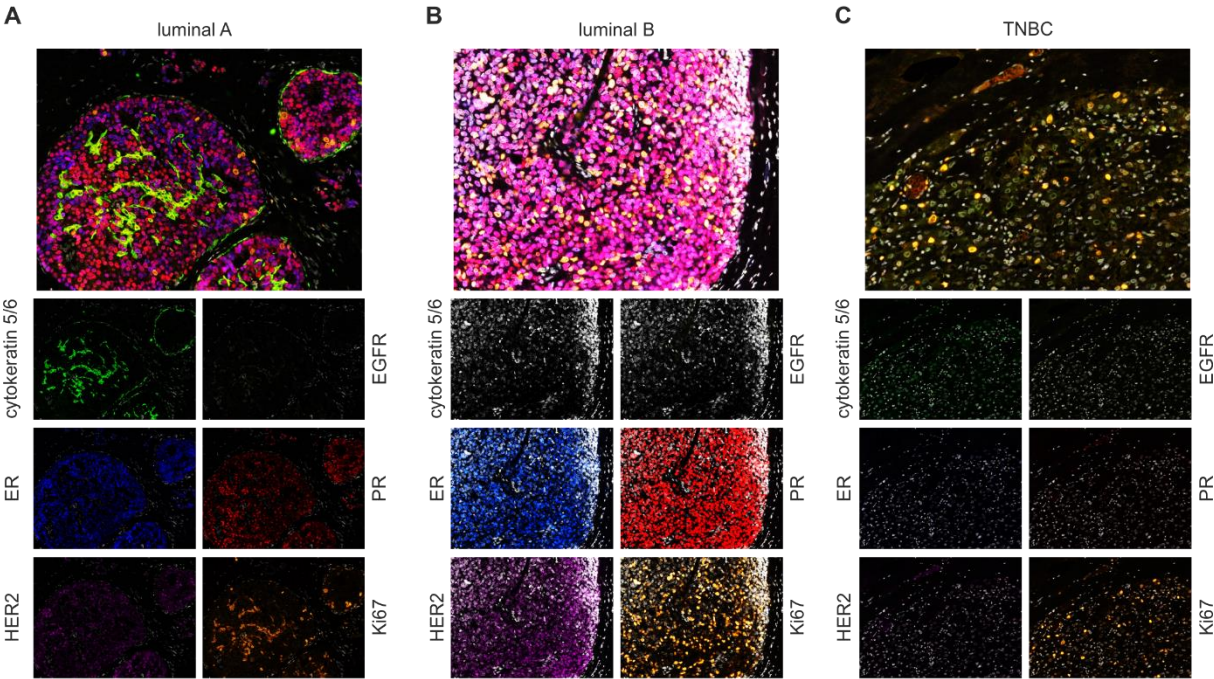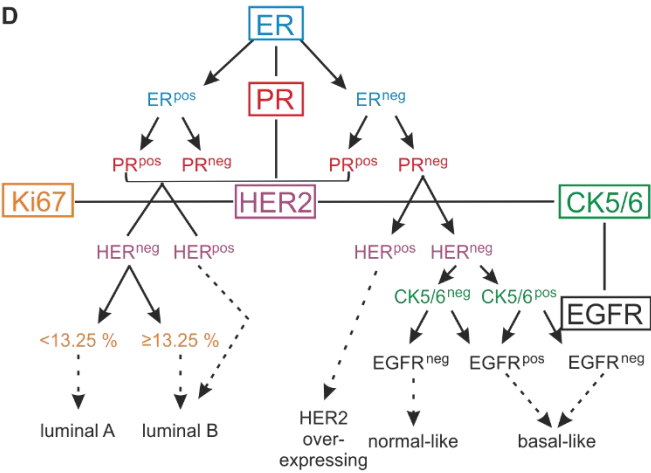

**Figure S5:** Molecular profiling of analyzed breast tumors. (A-C) Representative immunofluorescence staining of breast cancer subtype luminal A (A), luminal B (B) and TNBC (C). Tumor sections were stained with cytokeratin 5/6 (green), EGFR (yellow), the hormone receptors ER (blue), PR (red), and HER2 (magenta). The proliferation marker Ki67 is depicted in orange and nuclei were counterstained with

*DAPI (white). (D) Overview of molecular profiling scheme connecting all stained markers in A-C.*

Figure S6

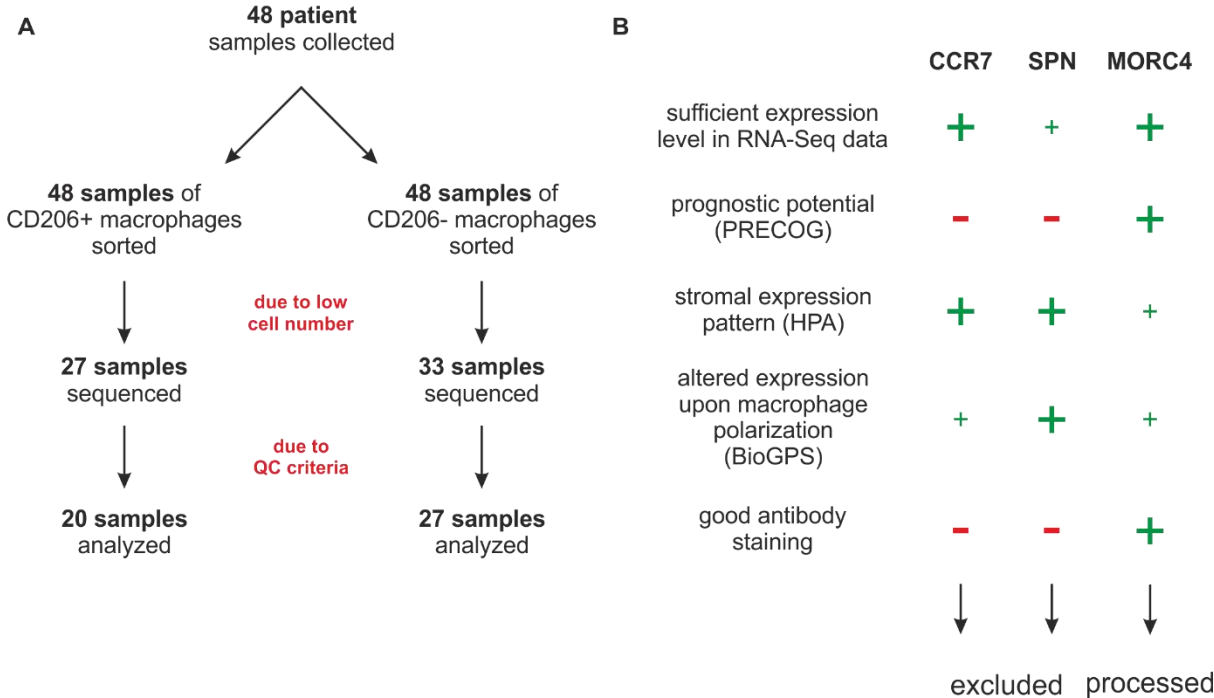

Figure S6: **(A)** Overview of sample selection and validation. CD206<sup>+</sup> and CD206<sup>-</sup> macrophages were simultaneously sorted from 48 patient samples. 27 CD206<sup>+</sup> macrophage samples and 33 CD206<sup>-</sup> macrophage samples were sufficient for library preparation. After sequencing 7 CD206<sup>+</sup> and 6 CD206<sup>+</sup> macrophage samples were excluded due to low sample quality. **(B)** Example of target selection. DEGs between CD206<sup>+</sup> and CD206<sup>-</sup> macrophages were checked for sufficient expression, prognostic potential, stromal expression, altered expression after polarization and availability of antibody. Green plus (+) indicates fulfilled criteria, red minus (-) shows criteria, which are not met.

Figure S7

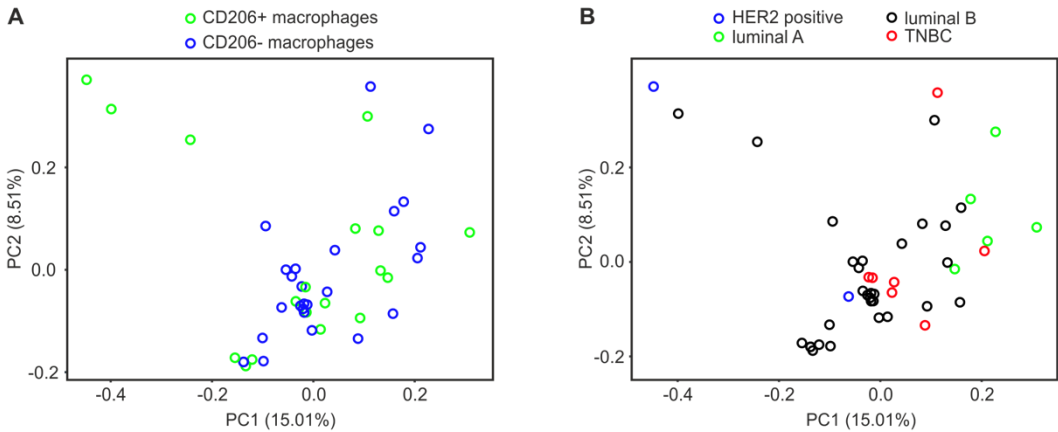

**Figure S7:** PCA analysis of macrophages clustered by subpopulation and cancer subtype. **(A, B)** PCA analysis of macrophages sorted from primary breast cancer after quality control. **(A)** Macrophage samples were clustered by CD206 expression. CD206<sup>+</sup> macrophages are shown in green and CD206<sup>-</sup> macrophages are depicted in blue. **(B)** Macrophage samples were clustered by the hormone receptor status of tumor sample. Macrophages were sorted from HER2 positive breast tumors (blue), the subtypes luminal A (green), luminal B (black), and TNBC (red). Only samples with an available subtype were included in these plots.

Figure S8

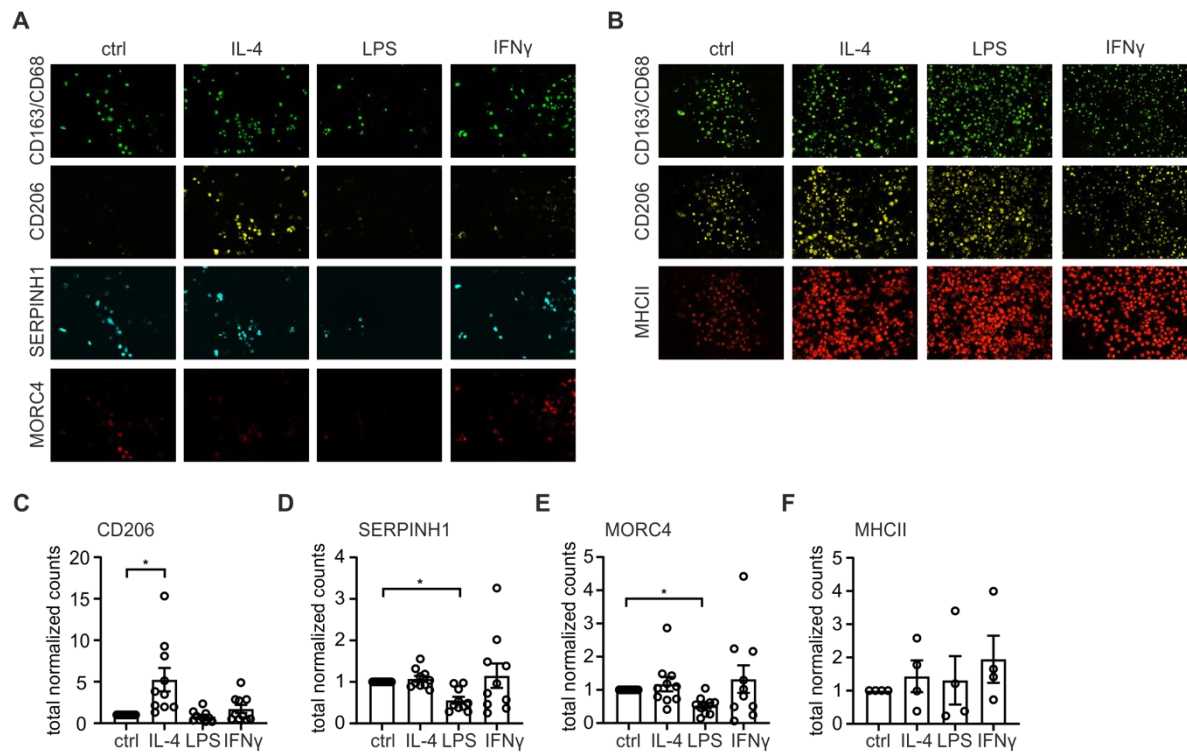

**Figure S8:** (A-B) Immunofluorescence staining of in-vitro stimulated M $\Phi$ . Untreated M $\Phi$  (ctrl) as well as IL-4, LPS and IFN $\gamma$  stimulated M $\Phi$  were stained for CD163/68 (green), CD206 (yellow), SERPINH1 (cyan), and (A) MORC4 (red) or (B) MHCII (red). (C-F) Quantitative analysis of in-vitro stimulated M $\Phi$  shown in A and B for the expression of CD206 (n=10) (C), SERPINH1 (n=10) (D), MORC4 (n=10) (E) and MHCII (n=4) (F) after IL-4, LPS or IFN $\gamma$  stimulation compared to untreated M $\Phi$  (ctrl). Expression data is normalized to untreated M $\Phi$  (ctrl=1). Data are  $\pm$  SEM.



Figure S9

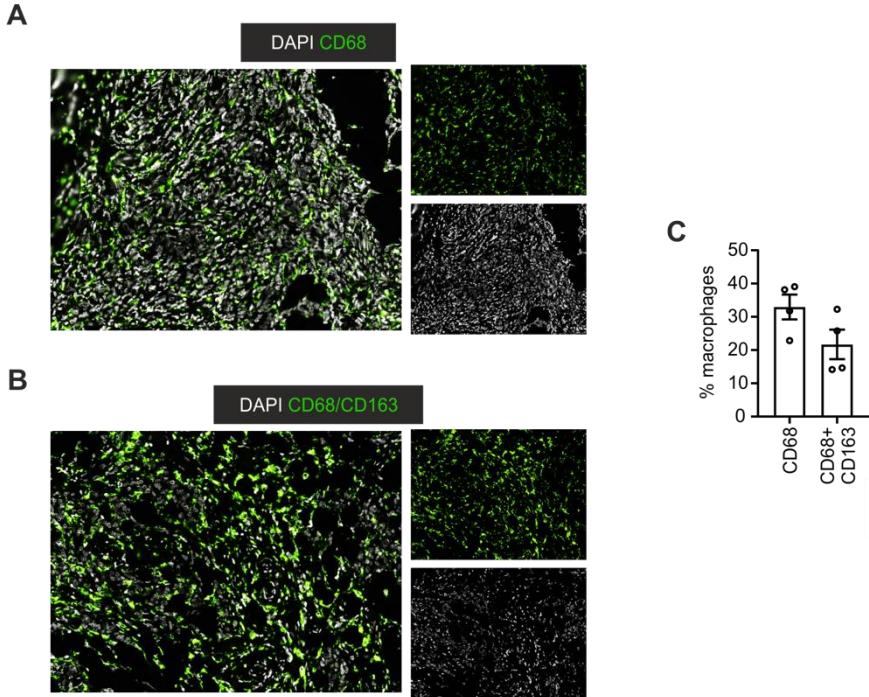

**Figure S9:** Histology of macrophage markers. (A, B) Representative immunofluorescence staining of one primary breast tumor. Tissue was stained with only CD68 (A, green) or with an antibody mix of CD163 and CD68 (B, green). (C) Quantitative analysis of macrophages stained with either CD68 (n=4) alone or CD68 with CD163 (n=4) in one tumor specimen with 4 independent regions each. Data are  $\pm$  SEM.

Figure S10

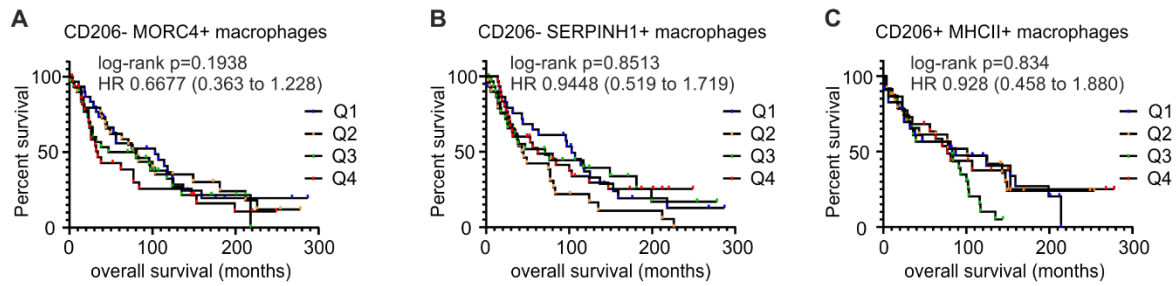

**Figure S10: Macrophage subpopulations and patient survival.** Analysis of TMA staining for CD206 in combination with MORC4 ( $n=154$ ) (A), SERPINH1 ( $n=154$ ) (B) and MHCII ( $n=94$ ) (C) in invasive breast cancer. Kaplan-Meier estimates analyze the association of indicated cell populations with patient survival. Q1 marks the lowest quartile of indicated cell subtype abundance in the tissues and Q4 the highest quartile ( $n = 38$  in each quartile for D-G, I and K;  $n = 24$  for L). Hazard ratios were calculated between Q1 and Q4..

Figure S11

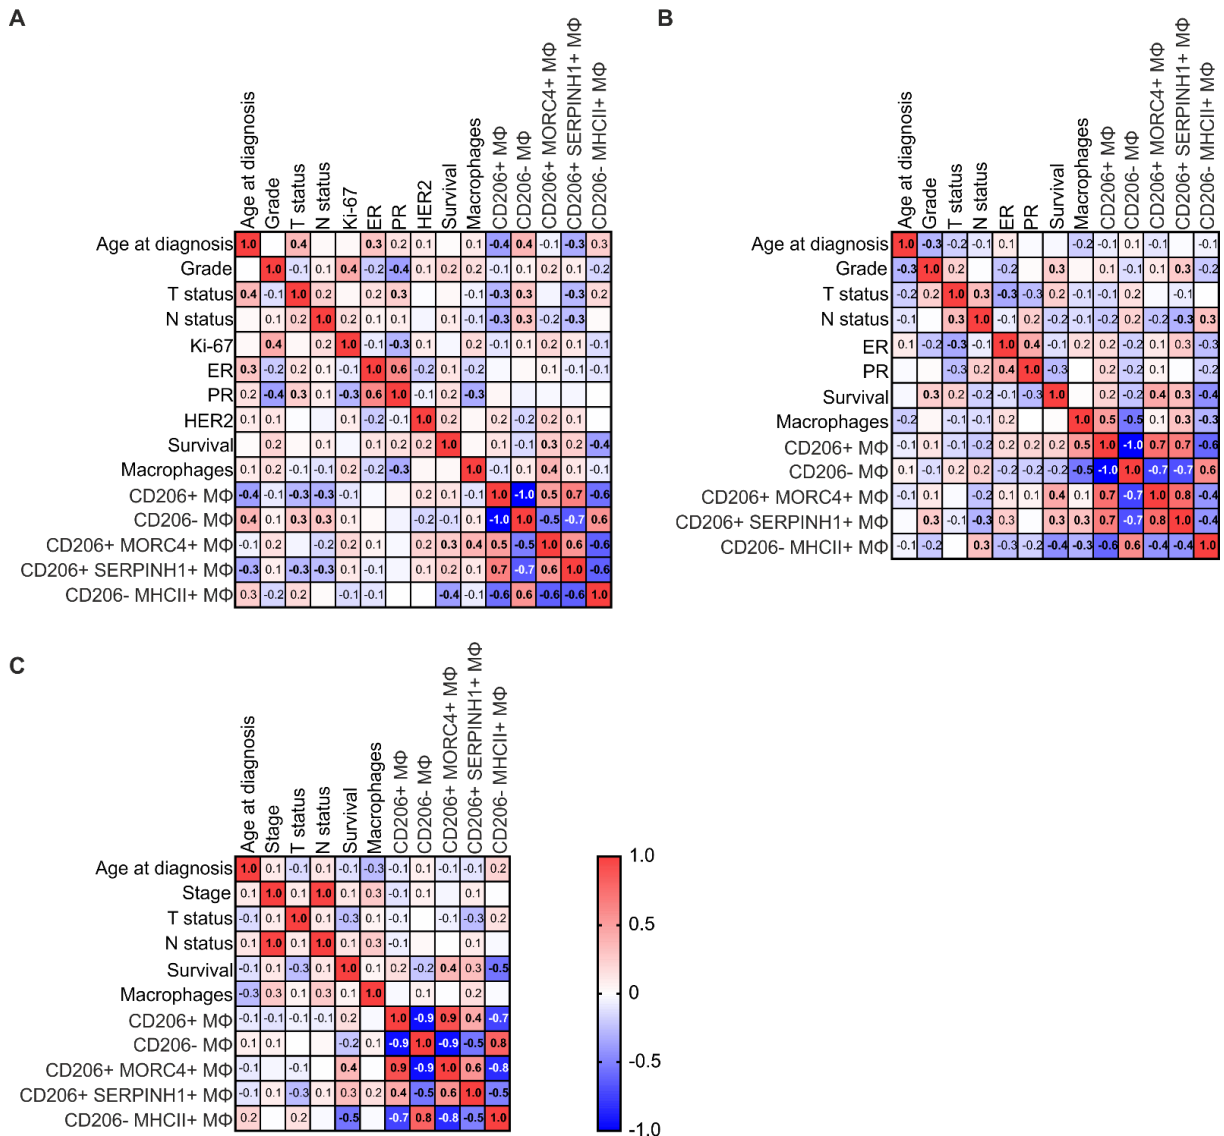

**Figure S11:** Analysis of TMA staining for CD206 in combination with MORC4, SERPINH1, and MHCII in (A) relapsed ER+ breast cancer (n=54), (B) HER2+ breast cancer (n=38), and (C) TNBC (n=26). Correlation matrices different macrophages populations and clinical parameters available are shown. Positive correlation is indicated in red, negative correlation in blue. Numbers indicate Pearson r-value; bold script indicates statistical significance,  $p \leq 0.05$ .
